**Title:** Autism-related behavioral phenotypes of three *Camk2a* mutant mouse lines with reduced CaMKII $\alpha$  expression and/or activity.

**Running Title:** CaMKII $\alpha$  modulates motor and sensory systems

**Authors:** Jessica R. Thomas<sup>1</sup>, Keeley L. Spiess<sup>1\*</sup>, and Roger J. Colbran<sup>1,2,3</sup>

**Institutional affiliations:** <sup>1</sup>Department of Molecular Physiology and Biophysics, <sup>2</sup>Vanderbilt Brain Institute, and <sup>3</sup>Vanderbilt-Kennedy Center for Research on Human Development, Vanderbilt University, Nashville, TN, USA

\* Current address: University of North Carolina at Chapel Hill

ORCID ID: 0000-0001-6468-4649, J.R.T.; 0000-0001-7357-4337, K.L.S; 0000-0001-7401-8244, R.J.C.

**Acknowledgments:**

All behavioral experiments were performed in part through the use of the Vanderbilt Murine Neurobehavior Core lab supported in part by the EKS NICHD of the NIH under Award #U54HD083211. The content is solely the responsibility of the authors and does not necessarily represent the official views of the NIH. This study was funded by: Burroughs Wellcome Fund Postdoctoral Enrichment Program and Postdoctoral Training Program in Functional Neurogenomics (T32-MH065215)

**Title:** Autism-related behavioral phenotypes of three *Camk2a* mutant mouse lines with reduced CaMKII $\alpha$  expression and/or activity.

**Running Title:** CaMKII $\alpha$  modulates motor and sensory systems

**Authors:** Jessica R. Thomas<sup>1</sup>, Keeley Spiess<sup>1\*</sup>, and Roger J. Colbran<sup>1,2,3</sup>

**Institutional affiliations:** <sup>1</sup>Department of Molecular Physiology and Biophysics, <sup>2</sup>Vanderbilt Brain Institute, and <sup>3</sup>Vanderbilt-Kennedy Center for Research on Human Development, Vanderbilt University, Nashville, TN, USA

\* Current address: University of North Carolina at Chapel Hill

### **Acknowledgments:**

All behavioral experiments were performed in part through the use of the Vanderbilt Murine Neurobehavior Core lab supported in part by the EKS NICHD of the NIH under Award #U54HD083211. The content is solely the responsibility of the authors and does not necessarily represent the official views of the NIH. This study was funded by: Burroughs Wellcome Fund Postdoctoral Enrichment Program and Postdoctoral Training Program in Functional Neurogenomics (T32-MH065215)

### **Abstract**

Ca<sup>2+</sup>/calmodulin-dependent protein kinase II (CaMKII) is a key modulator of excitatory synaptic transmission, gene expression, learning and memory. Mutations in the *CAMK2A* gene, which encodes CaMKII $\alpha$  and is highly expressed in multiple regions in the forebrain, have been recently linked to neurodevelopmental disorders such as autism spectrum disorder (ASD) and intellectual disability (ID). Our lab generated and characterized a knock-in (KI) mutant mouse with a glutamate-183 to valine (E183V) CaMKII $\alpha$  mutation detected in several children diagnosed with ASD or ID. The E183V mutation reduces CaMKII $\alpha$  activity and expression levels but the contributions of these two changes to the ASD-related behavioral phenotypes of these mice are unclear. Therefore, we performed side-by-side comparisons of the behavioral phenotypes of CaMKII $\alpha$  E183V-KI mice with two other mutant mouse lines with either a complete loss of CaMKII $\alpha$  expression (CaMKII $\alpha$  Null mice) or reduced kinase activity (due to a threonine-286 to alanine mutation that abrogates autophosphorylation at this site) with no significant change in expression levels (CaMKII $\alpha$  T286A-KI mice). In all three lines, homozygous mutant mice displayed increased stereotypic jumping behavior and hyperactivity, without alterations in anxiety or social interactions. Interestingly, homozygous mutant mice in all three lines also displayed a substantial reduction in tactile sensitivity using the Von Frey filament test. Together, these data suggest that reductions of either CaMKII $\alpha$  expression or activity in mice disrupted normal motor and sensory functions.

**Keywords:** CaMKII, autism, autophosphorylation, sensory, social, anxiety, stereotypic

## Introduction

Ca<sup>2+</sup>/calmodulin-dependent protein kinase (CaMKII) is a serine/threonine kinase that is encoded by four mammalian genes (*CAMK2A*, *CAMK2B*, *CAMK2G*, *CAMK2D* in humans) <sup>1-3</sup>. A single CaMKII subunit contains catalytic, regulatory and association domains. In the basal state, the regulatory domain interacts with the catalytic domain to block the active site and suppress kinase activity <sup>4,5</sup>. This interaction is disrupted by Ca<sup>2+</sup>/calmodulin binding to the regulatory domain, exposing the ATP- and substrate-binding sites to activate the kinase <sup>6-8</sup>. Self-oligomerization of the association domain forms the dodecameric hub of a holoenzyme, facilitating efficient autophosphorylation between adjacent activated subunits in the regulatory domain (at Thr286 in CaMKII $\alpha$ ; Thr287 in other isoforms) <sup>9-12</sup>. Thr286/287 autophosphorylation prevents the regulatory domain from interacting with the catalytic domain following Ca<sup>2+</sup>/calmodulin dissociation, resulting in autonomous (Ca<sup>2+</sup>-independent) CaMKII activity <sup>13-15</sup>.

Given abundant evidence that CaMKII is a critical regulator of the synaptic processes that underlie learning and memory <sup>16-18</sup>, it is perhaps surprising that mutations in the *CAMK2A*, *CAMK2B* and *CAMK2G* genes were only recently linked to neurodevelopmental and neurological disorders, including autism spectrum disorder (ASD), intellectual disability (ID) and epilepsy <sup>19-22</sup>. Non-synonymous mutations in the catalytic, regulatory, and association domains have been functionally characterized to varying extents <sup>19,21-26</sup>. Our lab characterized a unique ASD-linked *de novo* *CAMK2A* mutation, encoding a glutamate-183 to valine (E183V) substitution in the catalytic domain of the CaMKII $\alpha$  isoform, which is abundantly expressed in many parts of the forebrain. This same mutation was later identified in other children with ID or ASD <sup>20,26</sup>. *In vitro* studies showed that the E183V mutation severely reduced CaMKII $\alpha$  kinase activity, Thr286 autophosphorylation and binding to multiple CaMKII-associated proteins (CaMKAPs). Expression of E183V-CaMKII $\alpha$  in cultured hippocampal neurons disrupted dendritic outgrowth and dendritic spine formation, and reduced excitatory synaptic transmission. Moreover, homozygous mice with the CaMKII $\alpha$  E183V knock-in mutation (E183V-KI mice) displayed ASD-related behavioral phenotypes: impaired social interactions, repetitive behaviors, and hyperactivity. However, in addition to the loss of kinase activity and Thr286 autophosphorylation, CaMKII $\alpha$  expression was substantially reduced in E183V-KI mice. As a result, ASD-related behaviors in CaMKII $\alpha$  E183V-KI mice may be due to reductions of CaMKII $\alpha$  expression and/or activity.

While reduction or loss of CaMKII $\alpha$  expression and/or activity in mice generally alters synaptic plasticity and behavior, some differences in phenotypes have been reported. For example, loss of CaMKII $\alpha$  expression resulted in enhanced short-term plasticity, while complete or partial loss of CaMKII $\alpha$  activity did not impact short-term plasticity <sup>27-29</sup>. Moreover, loss of CaMKII $\alpha$  expression or activity impaired spatial memory, but visually guided memory remained intact when CaMKII $\alpha$  activity, but not expression, was abolished <sup>16,30</sup>. In addition, the functional impact of losing CaMKII $\alpha$  expression or activity may be brain region specific <sup>30,31</sup>. For example, hippocampal-

dependent memory, such as contextual memory, appears to require CaMKII $\alpha$  activity, while amygdala-dependent cued fear memory may not<sup>30</sup>. However, some of the variability in these reported phenotypes may arise from differences in the strain background and/or housing conditions of *Camk2a* mutant mice tested. These issues can only be resolved by making side-by-side comparisons of the *Camk2a* mutant mice.

Here, we report side-by-side phenotypic comparisons of CaMKII $\alpha$  Null mice that lack CaMKII $\alpha$  expression, CaMKII $\alpha$  T286A-KI mice with reduced autonomous CaMKII $\alpha$  activity due to a lack of Thr286 autophosphorylation, and CaMKII $\alpha$  E183V-KI mice with reduced CaMKII $\alpha$  expression and CaMKII $\alpha$  activity. We compare social, motor, and sensory behaviors, hyperactivity and anxiety. We found that all three mouse lines have similar impairments in motor behaviors and sensory functions, but no substantial impairments in social functions and anxiety. Moreover, the paws of all three mouse lines displayed robust tactile hyposensitivity in the Von Frey filament test.

## Materials and Methods

### *Animals*

Mice (2-5 mice) were housed in standard cages with paper bedding on a 12-hour light/dark cycle (light: 6:00 A.M. to 6:00 P.M.) with food and water ad libitum. CaMKII $\alpha$  E183V-KI mice (MGI: 5811610) were described previously<sup>26</sup>, and were backcrossed at least six times to a C57BL/6J (B6) background for the current studies. CaMKII $\alpha$  Null mice also were previously described<sup>32</sup> and backcrossed to a B6 background. CaMKII $\alpha$  T286A-KI mice (MGI:2158733)<sup>33</sup> also were on a B6 background. Genotyping was performed before and after behavioral testing. Genotyping assays for CaMKII $\alpha$  Null and T286A mice were previously described<sup>32,34</sup>. Primers used to genotype the CaMKII $\alpha$  E183V-KI mice are as follows:

forward, 5'- TATACCTGTCTGCTGGTCCCAGTCTGG -3',  
reverse, 5'- CGTACGGGTCCTTCCTCAGCACTT -3' for WT;  
and forward, 5'-GACACCTGGATACCTCTCCCCAGTG -3',  
reverse, 5'-GAGGAGCAGGAGAGGAGAGATGAC-3' for KI.

We tested 2-3 cohorts of the three CaMKII $\alpha$  mutant mouse lines, with each cohort containing the random mixture of male and female mice of each genotype generated using a standard HETXHET breeding strategy. Behavioral tests were performed between the ages of 7 and 18 weeks of age in the order listed below, with the exception that some data included in figures 3 (3-chamber social test) and 7 (Von Frey filament test) were obtained using naïve mice, as described below. The experimenter was blinded to genotypes during testing.

All mouse experiments were approved by the Vanderbilt University Institutional Animal Care and Use Committee and were performed in accordance with the National Institutes of Health Guide for the care and use of laboratory animals.

### *Novel open-field locomotor activity (7-14 weeks)*

Naïve mice were placed in the center of a 27 x 27 cm open-field chamber housed in sound- attenuating case (Med Associates) for a 60-min. period. The center zone of the open-field box was pre-defined (19.05 x 19.05 cm) in the Activity Monitor software (Med

Associates; RRID:SCR\_014296), which recorded infrared beams breaks as movements in the center and outer zones in the x-, y-, and z-dimensions.

#### *Elevated plus maze (7-16 weeks)*

The four arms of the maze were approximately 5-cm wide and elevated approx. 2 feet from the floor. The open arms had a 0.5 cm lip to prevent the mouse from falling whereas the walls of closed arms were 20-30 cm tall. Mice were placed at the intersection of the arms and permitted to explore freely for 10 min while being videotaped from above. Mouse behavior was tracked and measured using ANY-maze software (Stoelting; RRID:SCR\_014289). The position of the mouse was scored based on the location of the head and trunk of the test mouse in the open arms, closed arms, or center of the maze (Stoelting).

#### *Light-Dark box (8-18 weeks)*

The open-field chambers described above were divided into light and dark zones using a black Plexiglass insert measuring 13.5 x 27 cm. The test was started by placing mice in the light side of the chamber and giving them 10 mins to explore the light and dark zones of the box, as pre-defined using the Activity Monitor software (Med Associates). In addition, the software recorded infrared beams breaks in the x-, y-, and z- dimensions as movements in the pre-defined zones.

#### *Three-chambered test (10-18 weeks)*

Social exploration was measure in a clear polycarbonate apparatus, covered with white paper towel to block visual cues, with 4-inch sliding gates separating three 7 x 9-inch chambers. Both side chambers contained an inverted metal wire pencil cup in one corner. There were two phases to the testing: (1) A 10 min habituation session allowed the test mouse to freely explore all three chambers with empty wire cups in both positions. (2) After guiding the test mouse into the center chamber, a WT stranger mouse of the same sex was placed under one of the two metal cups. The test mouse was then allowed to freely explore all three chambers for 10 min. Mouse behavior was videotaped from above and measured using ANY-maze software (Stoelting). Interactions with the stranger mouse cup and the empty wire cup were scored as the amount of time the head and trunk of the test mouse was located within 2 cm of the appropriate wire cup. Mice from an initial cohort were excluded from the final analysis due to a technical error with the choice of stranger mice, and additional naïve mice were tested; there was no obvious difference in phenotypes between naïve mice and mice that experienced the prior behavioral tests, so the data were pooled for inclusion in the final Figure 3.

#### *Von Frey filament test (7-13 weeks)*

Mice were acclimated to a 10 X 14 cm chamber with a wire floor for 1 hr. Filaments of various diameters were pressed against the plantar surface of the foot, bending to produce a constant application force from 0.01 to 10 mN. Filaments were tested in ascending order until a foot withdrawal response was observed. This process was repeated three times on alternating hind paws (twice on one paw and once on contralateral hind paw). For each mouse, the average of the three readings was

calculated to determine the average force required to evoke a paw withdrawal. Additional data obtained using naïve mice were included in the final figure 7 because there was no obvious difference in phenotypes compared with mice that experienced the prior behavioral tests.

*Data analysis and statistics.* A ROUT test was used to identify outliers. The D'Agostino & Pearson and Shapiro-Wilk tests were used to test for normality. Statistical analyses of normally-distributed data used a paired t-test, one-way analysis of variance (ANOVA), or repeated measures two-way ANOVA (GraphPad Prism 9.2.0, LaJolla, CA, USA; RRID:SCR\_002798), as described in the figure legends. A Kruskal-Wallis test was used to test data that was not normally distributed. If ANOVAs revealed significant variation between groups, Bonferroni, Dunn's, or Tukey *post hoc* test was performed for pair-wise comparisons of multiple groups, as recommended in Prism (see figure legends). P values of < 0.05 were considered statistically significant. The results of selected statistical comparisons are cited in the text or figure legends and complete Prism outputs from all statistical tests are reported in supplementary table 1. All data are plotted as the mean  $\pm$  SEM with super-imposed values for individual mice shown in a scatter plot.

## Results

### *Stereotypic phenotypes*

CaMKII $\alpha$  E183V-KI homozygous (HOM) mice on a mixed background exhibited sustained and robust increases in jumping and rearing behaviors when monitored for 30 min in the open field test<sup>26</sup>. Therefore, we compared jumping behaviors of wild-type (WT), heterozygous (HET) or HOM mice from the three CaMKII $\alpha$  mutant mouse lines using the open-field test. HOM CaMKII $\alpha$  E183V-KI (E183V-KI) mice on the pure B6 background displayed an enhanced jumping phenotype over the total 60 min test period (**Fig 1A**). Likewise, HOM CaMKII $\alpha$  Null and CaMKII $\alpha$  T286A-KI (Null and T286A-KI, respectively) mice exhibited increased total jumping compared to WT littermates (**Fig 1B-C**). More detailed comparison of jumping behavior in 5 min time blocks revealed that the jumping behavior of WT and HET mice from all three lines progressively decreased during the 60 min test. HOM mice from all three lines displayed increased jumping during the first 5-10 min of the test, but the jumping behaviors of HOM E183V-KI and Null mice were more persistent and remained elevated compared to WT and HET littermates throughout the test. In contrast, jumping behavior of HOM T286A-KI decreased over time, and was not significantly different from WT or HET littermates during the last 10 min of the test (**Fig 1D-F**). These data suggest a reduction in CaMKII $\alpha$  expression or activity is sufficient to induce a repetitive, stereotypic jumping behavior, where a complete loss of both activity and expression results in a somewhat more severe phenotype.

### *Hyperactivity*

We next assessed the total distance traveled by each mouse line in the novel open-field test. HOM mice from all three mutant lines covered a significantly greater total distance over the 60 min test period relative to WT and HET littermates (**Fig 2A-C**).

More detailed analysis of activity across the test period revealed that distances travelled by HOM mice in each line were significantly higher than distances traveled by HET and WT littermates during the initial 5-10 min of the test. Moreover, distances travelled by the three genotypes in each mouse line progressively decreased during each successive 5 min period, as expected due to habituation of the mice to the chambers. However, HOM CaMKII $\alpha$  Null remained significantly hyperactive relative to WT and HET littermates throughout the 60 min test, whereas HOM E183V-KI and HOM T286-KI mice were significantly hyperactive relative to WT and HET littermates mostly during the first 20-30 min (**Fig 2D-F**). Taken together, these data suggest that decreasing CaMKII $\alpha$  expression or activity is sufficient to induce hyperactivity, but that hyperactivity is somewhat more pronounced and persistent when both expression and activity are completely lost.

### *Social exploratory behavior*

Next, we assessed social interaction using the three-chamber social test (3CST), which is widely used to characterize social phenotypes for ASD mouse models<sup>35,36</sup>. During the habituation phase, none of the mice distinguished between two empty wire cups (**Fig 3A-C**). During the test phase, WT, HET, and HOM E183V-KI mice spent significantly more time exploring the wire cup containing the mouse as opposed to the empty cup (**Fig 3D**). Similarly, WT and HET Null and T286A-KI mice spent significantly more time exploring the wire cup containing the mouse as opposed to the empty cup. In contrast, there was not a significant difference in the time that HOM Null and T286A-KI mice spent exploring the two cups (**Fig 3E-F**). Interestingly, a significant increase in the total distance traveled was observed for HOM E183V-KI, Null, and T286A-KI mice during the test phase compared to WT and HET littermates (**Fig 3G-I**), but there was no difference in the number of entries into the chambers containing an empty wire cup or a wire cup with a mouse underneath for WT, HET, or HOM amongst the three mouse lines (data not shown). These data confirm the hyperactivity of all three CaMKII $\alpha$  mouse lines that was observed in the open-field test, and indicate that this hyperactivity correlates with a modest reduction in social exploration, at least in the CaMKII $\alpha$  NULL and T286A-KI mice. Thus, reductions of CaMKII $\alpha$  expression and/or activity has a modest impact on social exploratory behavior.

### *Anxiety-related phenotypes*

As an initial assessment of potential anxiety phenotypes in CaMKII $\alpha$  mutant mice, we measured the amount of time spent in the center of the novel open-field arena. During the first 10 mins, HET and HOM E183V-KI mice spent less time in the center of the arena compared to WT littermates (**Fig 4A**), which is indicative of increased anxiety. HOM Null and T286A-KI mice, but not their HET littermates, spent less time in the center compared to WT mice (**Fig 4B-C**). However, the phenotypes appeared to change as the mice habituated to the open field arena. During the last 10 min in the open field arena, HET and HOM E183V-KI mice spent a similar amount of time in the center as their WT littermates (**Fig 4D**). Similarly, HOM Null mice spend an equal amount time in the center as their WT littermates, whereas HET Null mice spent more time in the center compared to WT and HOM littermates (**Fig 4E**), indicative of reduced anxiety. Moreover, HOM T286A-KI mice also spent more time in the center compared to WT and

HET littermates (**Fig 4F**). These data suggest that there is a complex time-dependent relationship between the reductions of CaMKII $\alpha$  activity and/or expression in these three mouse lines and anxiety in a novel environment.

To provide more insight into the relationship between *Camk2a* and anxiety, mice were tested for 10 min using an elevated plus maze (EPM). HOM E183V-KI, Null and T286A-KI mice spent significantly more time in the open arms of the maze than their WT or HET littermates, with a corresponding significant decrease in time spent in the closed arms (**Fig 5A-C**). In addition, HOM E183V-KI, Null and T286A-KI made significantly more entries into the open arm of the maze compared to their WT or HET littermates (**Fig 5D-F**). Moreover, HOM E183V-KI, Null and T286A-KI travelled a greater distance in the open arm of the maze compared to their WT or HET littermates (**Fig 5G-I**). Taken together, the EPM data indicate that HOM CaMKII $\alpha$  mutant mice from all three lines have reduced anxiety, in contrast to their apparent anxiety during the first 10 min of the open field test.

A light-dark box test was then used to further explore the relationship between *Camk2a* and anxiety phenotypes, again with a 10 min test period. There were no significant differences in the amount of time that WT, HET and HOM E183V-KI or T286A-KI mice spent in the light or dark areas of the box (**Figs 6A, 6C**). However, HOM Null mice spent slightly, but significantly, more time on the light side compared to WT mice, indicative of mildly reduced anxiety (**Fig 6B**). Moreover, we found no difference in the number of transitions between the light and dark side within any of the CaMKII $\alpha$  mouse lines (**Fig 6D-F**). In addition, HOM E183V-KI traveled a significantly greater distance in both the light and dark sections of the box than their littermates (**Fig 6G**). HOM Null mice also traveled a significantly greater distance in the light section of the box than their WT littermates. In contrast, there were no significant differences in the distance traveled by any genotype of the T286A-KI mice (**Fig 6H-I**). Taken together, the light-dark box data indicate that the complete loss of CaMKII $\alpha$  activity and expression in CaMKII $\alpha$  Null mice results in a modest decrease of anxiety-related behaviors, but this is not phenocopied in E183V-KI or T286A-KI mice.

### *Tactile phenotypes*

Since several ASD mouse models exhibit abnormal tactile responses<sup>37,38</sup>, we used the von Frey filament test to assess tactile responsiveness of our CaMKII $\alpha$  mutant mouse lines. More force (thicker filaments) was required to elicit paw withdrawal responses in HOM E183V-KI, Null and T286A-KI mice compared to WT and HET littermates (**Fig 7A-C**). This data show that loss of CaMKII $\alpha$  activity or expression is sufficient to blunt responses to tactile input.

## Discussion

In this study, we compared the impact of different loss of function *Camk2a* mutations on mouse behavioral phenotypes often considered to be related to human ASD symptoms<sup>36,39</sup>. First, we found that reductions in CaMKII $\alpha$  expression or activity are sufficient to increase stereotypic jumping behavior and hyperactivity. Second, we



found that a reduction in CaMKII $\alpha$  activity and expression impact social exploration with only mild effects on anxiety-related behaviors. Finally, we found that decreases in CaMKII $\alpha$  expression or activity reduce sensitivity to peripheral tactile input. Taken together, these results show that normal CaMKII $\alpha$  expression and/or activity is essential for normal motor, social, and sensory functions.

While ASD symptoms typically include social interaction deficits and stereotypic behaviors, there is also a variable spectrum of co-morbidities, often including generalized hyperactivity<sup>39,40</sup>. Several ASD mouse models also exhibit hyperactivity and stereotypic behaviors, especially in novel environments<sup>41,42</sup>. In the novel open field test, all three *Camk2a* mutant mouse lines exhibit increases in both stereotypic behavior (jumping; **Fig 1**) and overall locomotor activity (**Fig 2**). Interestingly, the severity of these two phenotypes depends to some degree on the severity of the *Camk2a* mutation. The jumping phenotype is more robust and persistent following the complete loss of CaMKII $\alpha$  protein and activity in HOM CaMKII $\alpha$  Null mice compared to HOM E183V-KI or T286A-KI mice. Similarly, the increased motor activity of HOM Null mice persists for at least 60 min in the open-field test, whereas the increased motor activity of HOM T286A-KI and E183V-KI mice is only evident during the first ~30 min of the novel open field test. Thus, a reduction of only CaMKII activity modestly enhances stereotypic jumping and locomotor activity when combined with the stress associated with entering a novel environment, whereas the complete loss of CaMKII $\alpha$  expression and activity significantly enhances these phenotypes.

Many ASD mouse models display a range of social interaction deficits<sup>35,36,43</sup>. However, WT, HET and HOM E183V-KI mice exhibited normal social exploratory behavior in the 3CST (**Fig 3**). HOM Null and T286A-KI mice failed to exhibit a significant preference for social interactions, although there was a trend for a social interaction preference in both lines. Taken together, the current data indicate only mild, if any, impairments in social preferences in the three *Camk2a* mutant mouse lines on a B6 strain background. However, our prior studies of E183V-KI mice on a mixed background detected significant social deficits, and female T286A-KI mice, which were also on a mixed background, were reported to exhibit significant social interaction phenotypes<sup>26,44</sup>. However, analysis of sex revealed any differences for any *Camk2a* mutant mouse (data not shown). The different genetic background of the mice used in these studies may affect the severity of social interaction deficits. Moreover, it is worth noting that other studies have shown that increasing or decreasing CaMKII $\alpha$  expression alters aggressive behaviors in mice<sup>45-47</sup>, perhaps also impacting social behaviors. Taken together, these data indicate that CaMKII mutations have relatively subtle effects on social behaviors that may depend on the strain of mice used.

Initial novel open-field testing indicated that HOM mice in all three *Camk2a* mutant lines spent less time in the center of the arena during the first 10 min of the trials (**Fig 4**), which is typically interpreted as an increase in anxiety. In addition, increased jumping behavior of these mice (**Fig 1**) could be interpreted as a sign of increased anxiety (i.e., a need to escape). While increased anxiety is typically associated with reduced exploratory activity<sup>36</sup>, HOM mice in all three lines exhibited increased overall

motor activity (**Fig 2**). Moreover, the novelty-induced stress of the open-field arena may have contributed to the apparent anxiety because the decrease in center time was not detected during the last 10 min (of the 60 min trial). In fact, there was an increased center time for HOM T286A-KI mice during the last 10 min, and also a trend for increased center time with HOM E183V-KI mice, indicative of reduced anxiety.

To provide greater clarity about possible anxiety-related phenotypes, we also tested *Camk2a* mutant mice in the EPM and light-dark box. However, these studies provided conflicting insight into the role of CaMKII $\alpha$  in anxiety. In the EPM, WT mice, as well as HET littermates from all three lines spent 3-8 times more time in the closed arm vs. the open arm. HOM mice from all three lines spent significantly more time in the high-risk open arms than their WT or HET littermates (**Fig 5**). In fact, HOM Null and T286A-KI mice failed to display any preference for the closed arms (closed/open time ratio 1.1 and 0.9, respectively), and the closed/open time ratio for HOM E183V-KI mice was significantly reduced relative to WT or HET littermates (E183V-KI closed/open arm time ratios: WT,  $8.2 \pm 1.5$ ; HET,  $6.3 \pm 1.0$ ; HOM,  $2.8 \pm 0.5$ ;  $p = 0.0001$  by 1-way ANOVA). In contrast to the apparently decreased anxiety of all three HOM mice in the EPM, the light-dark box revealed more modest, if any, anxiety phenotypes. In fact, only HOM Null mice displayed a significant change in preference for the light zone in the box relative to WT littermates, indicative of a mild decrease in anxiety, with no significant effects of the other *Camk2a* mutations on light-dark preference (**Fig 6**). Interestingly, the EPM also revealed significant increases of distances covered exploring high risk area (i.e. open arm) for HOM mice from all three lines, and this increase of high-risk exploration was confirmed for E183V-KI and Null mice in the light-dark box. In fact, before the EPM was complete, some HET and HOM mice would jump off the open arm, resulting in their exclusion from the analyses. A similar phenomenon was observed in pilot studies using an elevated zero maze (data not shown). Taken together, these data indicate that all three of these *Camk2a* mutations increase exploratory and impulsive behaviors, which may be misinterpreted as changes in anxiety in some testing paradigms.

Alterations in various forms of sensory perception are another common co-morbidity of ASD<sup>48,49</sup>, and several ASD mouse models display altered tactile sensitivity<sup>37,38</sup>. Previous studies of *Camk2a* Null and T286A-KI mice revealed alterations in the sensitivity to whisker stimulation<sup>50-52</sup>. Here we used the von Frey filament test to show for the first time that reduced CaMKII $\alpha$  expression and/or activity in any of the three *Camk2a* mutant mouse lines lead to a substantial loss of tactile sensitivity in the paw (**Fig 7**). Moreover, the sensitivity to a nociceptive electric foot shock was also shown to be increased by the loss of CaMKII $\alpha$  expression<sup>45</sup>, and CaMKII $\alpha$  has been linked to the development of chronic peripheral pain conditions such neuropathic and inflammatory pain<sup>53-56</sup>. While von Frey filaments do not appear to induce nociceptive responses, it will be interesting to investigate the role of CaMKII $\alpha$  in responses to more noxious stimuli, such as foot shock or heat.

## Conclusion

The current findings add to the diversity of mouse behavioral phenotypes that result from global genetic disruptions of CaMKII $\alpha$  activity or expression. This diversity is not surprising given that CaMKII $\alpha$  is widely expressed in many, but not all, parts of the forebrain, as well as in cerebellar Purkinje cells and spinal cord. Since prior studies have shown that one or more of these *Camk2a* mutation can disrupt normal excitatory synaptic transmission in the hippocampus, cortex, striatum, cerebellum and other brain regions, it seems likely that the diverse behavioral phenotypes observed here and in prior studies result from abnormal glutamate receptor function and synaptic plasticity in one or more brain regions. Further studies are required to reveal the relative contributions of disrupted synaptic function in specific brain regions to the behavioral phenotypes of CaMKII $\alpha$  mutant mice.

## References

1. Bayer KU, Lohler J, Schulman H, Harbers K. Developmental expression of the CaM kinase II isoforms: ubiquitous gamma- and delta-CaM kinase II are the early isoforms and most abundant in the developing nervous system. *Brain Res Mol Brain Res*. Jun 18 1999;70(1):147-54. doi:10.1016/s0169-328x(99)00131-x
2. Shonesy BC, Jalan-Sakrikar N, Cavener VS, Colbran RJ. CaMKII: a molecular substrate for synaptic plasticity and memory. *Prog Mol Biol Transl Sci*. 2014;122:61-87. doi:10.1016/B978-0-12-420170-5.00003-9
3. Tobimatsu T, Fujisawa H. Tissue-specific expression of four types of rat calmodulin-dependent protein kinase II mRNAs. *J Biol Chem*. Oct 25 1989;264(30):17907-12.
4. Chao LH, Stratton MM, Lee IH, et al. A mechanism for tunable autoinhibition in the structure of a human Ca<sup>2+</sup>/calmodulin-dependent kinase II holoenzyme. *Cell*. Sep 2 2011;146(5):732-45. doi:10.1016/j.cell.2011.07.038
5. Rellos P, Pike AC, Niesen FH, et al. Structure of the CaMKII $\delta$ /calmodulin complex reveals the molecular mechanism of CaMKII kinase activation. *PLoS Biol*. Jul 27 2010;8(7):e1000426. doi:10.1371/journal.pbio.1000426
6. Hanley RM, Means AR, Kemp BE, Shenolikar S. Mapping of calmodulin-binding domain of Ca<sup>2+</sup>/calmodulin-dependent protein kinase II from rat brain. *Biochem Biophys Res Commun*. Apr 15 1988;152(1):122-8. doi:10.1016/s0006-291x(88)80688-0
7. Kemp BE, Parker MW, Hu S, Tiganis T, House C. Substrate and pseudosubstrate interactions with protein kinases: determinants of specificity. *Trends Biochem Sci*. Nov 1994;19(11):440-4. doi:10.1016/0968-0004(94)90126-0
8. Payne ME, Fong YL, Ono T, et al. Calcium/calmodulin-dependent protein kinase II. Characterization of distinct calmodulin binding and inhibitory domains. *J Biol Chem*. May 25 1988;263(15):7190-5.
9. Hanson PI, Meyer T, Stryer L, Schulman H. Dual role of calmodulin in autophosphorylation of multifunctional CaM kinase may underlie decoding of calcium signals. *Neuron*. May 1994;12(5):943-56. doi:10.1016/0896-6273(94)90306-9
10. Lai Y, Nairn AC, Gorelick F, Greengard P. Ca<sup>2+</sup>/calmodulin-dependent protein kinase II: identification of autophosphorylation sites responsible for generation of Ca<sup>2+</sup>/calmodulin-independence. *Proc Natl Acad Sci U S A*. Aug 1987;84(16):5710-4. doi:10.1073/pnas.84.16.5710
11. Lou LL, Schulman H. Distinct autophosphorylation sites sequentially produce autonomy and inhibition of the multifunctional Ca<sup>2+</sup>/calmodulin-dependent protein kinase. *J Neurosci*. Jun 1989;9(6):2020-32.
12. Schworer CM, Colbran RJ, Keefer JR, Soderling TR. Ca<sup>2+</sup>/calmodulin-dependent protein kinase II. Identification of a regulatory autophosphorylation site adjacent to the inhibitory and calmodulin-binding domains. *J Biol Chem*. Sep 25 1988;263(27):13486-9.
13. Ohsako S, Nakazawa H, Sekihara S, Ikai A, Yamauchi T. Role of threonine-286 as autophosphorylation site for appearance of Ca<sup>2+</sup>(+)-independent activity of calmodulin-dependent protein kinase II alpha subunit. *J Biochem*. Jan 1991;109(1):137-43. doi:10.1093/oxfordjournals.jbchem.a123334
14. Colbran RJ, Fong YL, Schworer CM, Soderling TR. Regulatory interactions of the calmodulin-binding, inhibitory, and autophosphorylation domains of Ca<sup>2+</sup>/calmodulin-dependent protein kinase II. *J Biol Chem*. Dec 5 1988;263(34):18145-51.

15. Yang E, Schulman H. Structural examination of autoregulation of multifunctional calcium/calmodulin-dependent protein kinase II. *J Biol Chem*. Sep 10 1999;274(37):26199-208. doi:10.1074/jbc.274.37.26199
16. Silva AJ, Paylor R, Wehner JM, Tonegawa S. Impaired spatial learning in alpha-calcium-calmodulin kinase II mutant mice. *Science*. Jul 10 1992;257(5067):206-11. doi:10.1126/science.1321493
17. Silva AJ, Stevens CF, Tonegawa S, Wang Y. Deficient hippocampal long-term potentiation in alpha-calcium-calmodulin kinase II mutant mice. *Science*. Jul 10 1992;257(5067):201-6. doi:10.1126/science.1378648
18. Zalzman G, Federman N, Romano A. CaMKII Isoforms in Learning and Memory: Localization and Function. *Front Mol Neurosci*. 2018;11:445. doi:10.3389/fnmol.2018.00445
19. Akita T, Aoto K, Kato M, et al. De novo variants in CAMK2A and CAMK2B cause neurodevelopmental disorders. *Ann Clin Transl Neurol*. Mar 2018;5(3):280-296. doi:10.1002/acn3.528
20. Iossifov I, O'Roak BJ, Sanders SJ, et al. The contribution of de novo coding mutations to autism spectrum disorder. *Nature*. Nov 13 2014;515(7526):216-21. doi:10.1038/nature13908
21. Kury S, van Woerden GM, Besnard T, et al. De Novo Mutations in Protein Kinase Genes CAMK2A and CAMK2B Cause Intellectual Disability. *Am J Hum Genet*. Nov 2 2017;101(5):768-788. doi:10.1016/j.ajhg.2017.10.003
22. Brown CN, Cook SG, Allen HF, et al. Characterization of six CaMKIIalpha variants found in patients with schizophrenia. *iScience*. Oct 22 2021;24(10):103184. doi:10.1016/j.isci.2021.103184
23. Chia PH, Zhong FL, Niwa S, et al. A homozygous loss-of-function CAMK2A mutation causes growth delay, frequent seizures and severe intellectual disability. *Elife*. May 22 2018;7doi:10.7554/eLife.32451
24. Proietti Onori M, Koopal B, Everman DB, et al. The intellectual disability-associated CAMK2G p.Arg292Pro mutation acts as a pathogenic gain-of-function. *Hum Mutat*. Dec 2018;39(12):2008-2024. doi:10.1002/humu.23647
25. Rizzi S, Spagnoli C, Salerno GG, et al. Severe intellectual disability, absence of language, epilepsy, microcephaly and progressive cerebellar atrophy related to the recurrent de novo variant p.(P139L) of the CAMK2B gene: A case report and brief review. *Am J Med Genet A*. Nov 2020;182(11):2675-2679. doi:10.1002/ajmg.a.61803
26. Stephenson JR, Wang X, Perfitt TL, et al. A Novel Human CAMK2A Mutation Disrupts Dendritic Morphology and Synaptic Transmission, and Causes ASD-Related Behaviors. *J Neurosci*. Feb 22 2017;37(8):2216-2233. doi:10.1523/JNEUROSCI.2068-16.2017
27. Yamagata Y, Kobayashi S, Umeda T, et al. Kinase-dead knock-in mouse reveals an essential role of kinase activity of Ca<sup>2+</sup>/calmodulin-dependent protein kinase IIalpha in dendritic spine enlargement, long-term potentiation, and learning. *J Neurosci*. Jun 10 2009;29(23):7607-18. doi:10.1523/JNEUROSCI.0707-09.2009
28. Hojjati MR, van Woerden GM, Tyler WJ, et al. Kinase activity is not required for alphaCaMKII-dependent presynaptic plasticity at CA3-CA1 synapses. *Nat Neurosci*. Sep 2007;10(9):1125-7. doi:10.1038/nn1946
29. Hinds HL, Goussakov I, Nakazawa K, Tonegawa S, Bolshakov VY. Essential function of alpha-calcium/calmodulin-dependent protein kinase II in neurotransmitter release at a

- glutamatergic central synapse. *Proc Natl Acad Sci U S A*. Apr 1 2003;100(7):4275-80. doi:10.1073/pnas.0530202100
30. Yamagata Y, Yanagawa Y, Imoto K. Differential Involvement of Kinase Activity of Ca(2+)/Calmodulin-Dependent Protein Kinase IIalpha in Hippocampus- and Amygdala-Dependent Memory Revealed by Kinase-Dead Knock-In Mouse. *eNeuro*. Jul-Aug 2018;5(4)doi:10.1523/ENEURO.0133-18.2018
31. Achterberg KG, Buitendijk GH, Kool MJ, et al. Temporal and region-specific requirements of alphaCaMKII in spatial and contextual learning. *J Neurosci*. Aug 20 2014;34(34):11180-7. doi:10.1523/JNEUROSCI.0640-14.2014
32. Marks CR, Shonesy BC, Wang X, Stephenson JR, Niswender CM, Colbran RJ. Activated CaMKIIalpha Binds to the mGlu5 Metabotropic Glutamate Receptor and Modulates Calcium Mobilization. *Mol Pharmacol*. Dec 2018;94(6):1352-1362. doi:10.1124/mol.118.113142
33. Gustin RM, Shonesy BC, Robinson SL, et al. Loss of Thr286 phosphorylation disrupts synaptic CaMKIIalpha targeting, NMDAR activity and behavior in pre-adolescent mice. *Mol Cell Neurosci*. Aug 2011;47(4):286-92. doi:10.1016/j.mcn.2011.05.006
34. Giese KP, Fedorov NB, Filipkowski RK, Silva AJ. Autophosphorylation at Thr286 of the alpha calcium-calmodulin kinase II in LTP and learning. *Science*. Feb 6 1998;279(5352):870-3. doi:10.1126/science.279.5352.870
35. Moy SS, Nadler JJ, Young NB, et al. Mouse behavioral tasks relevant to autism: phenotypes of 10 inbred strains. *Behav Brain Res*. Jan 10 2007;176(1):4-20. doi:10.1016/j.bbr.2006.07.030
36. Silverman JL, Yang M, Lord C, Crawley JN. Behavioural phenotyping assays for mouse models of autism. *Nat Rev Neurosci*. Jul 2010;11(7):490-502. doi:10.1038/nrn2851
37. Orefice LL, Mosko JR, Morency DT, et al. Targeting Peripheral Somatosensory Neurons to Improve Tactile-Related Phenotypes in ASD Models. *Cell*. Aug 8 2019;178(4):867-886 e24. doi:10.1016/j.cell.2019.07.024
38. Orefice LL, Zimmerman AL, Chirila AM, Sleboda SJ, Head JP, Ginty DD. Peripheral Mechanosensory Neuron Dysfunction Underlies Tactile and Behavioral Deficits in Mouse Models of ASDs. *Cell*. Jul 14 2016;166(2):299-313. doi:10.1016/j.cell.2016.05.033
39. Sharma SR, Gonda X, Tarazi FI. Autism Spectrum Disorder: Classification, diagnosis and therapy. *Pharmacol Ther*. Oct 2018;190:91-104. doi:10.1016/j.pharmthera.2018.05.007
40. Tye C, Runicles AK, Whitehouse AJO, Alvares GA. Characterizing the Interplay Between Autism Spectrum Disorder and Comorbid Medical Conditions: An Integrative Review. *Front Psychiatry*. 2018;9:751. doi:10.3389/fpsy.2018.00751
41. Han K, Holder JL, Jr., Schaaf CP, et al. SHANK3 overexpression causes manic-like behaviour with unique pharmacogenetic properties. *Nature*. Nov 7 2013;503(7474):72-7. doi:10.1038/nature12630
42. Kramvis I, Mansvelder HD, Loos M, Meredith R. Hyperactivity, perseveration and increased responding during attentional rule acquisition in the Fragile X mouse model. *Front Behav Neurosci*. 2013;7:172. doi:10.3389/fnbeh.2013.00172
43. Crawley JN, Belknap JK, Collins A, et al. Behavioral phenotypes of inbred mouse strains: implications and recommendations for molecular studies. *Psychopharmacology (Berl)*. Jul 1997;132(2):107-24. doi:10.1007/s002130050327

44. Harda Z, Dzik JM, Nalberczak-Skora M, et al. Autophosphorylation of alphaCaMKII affects social interactions in mice. *Genes Brain Behav.* Jun 2018;17(5):e12457. doi:10.1111/gbb.12457
45. Chen C, Rainnie DG, Greene RW, Tonegawa S. Abnormal fear response and aggressive behavior in mutant mice deficient for alpha-calcium-calmodulin kinase II. *Science.* Oct 14 1994;266(5183):291-4. doi:10.1126/science.7939668
46. Hasegawa S, Furuichi T, Yoshida T, et al. Transgenic up-regulation of alpha-CaMKII in forebrain leads to increased anxiety-like behaviors and aggression. *Mol Brain.* Mar 4 2009;2:6. doi:10.1186/1756-6606-2-6
47. Yamasaki N, Maekawa M, Kobayashi K, et al. Alpha-CaMKII deficiency causes immature dentate gyrus, a novel candidate endophenotype of psychiatric disorders. *Mol Brain.* Sep 10 2008;1:6. doi:10.1186/1756-6606-1-6
48. Marco EJ, Hinkley LB, Hill SS, Nagarajan SS. Sensory processing in autism: a review of neurophysiologic findings. *Pediatr Res.* May 2011;69(5 Pt 2):48R-54R. doi:10.1203/PDR.0b013e3182130c54
49. Siemann JK, Veenstra-VanderWeele J, Wallace MT. Approaches to Understanding Multisensory Dysfunction in Autism Spectrum Disorder. *Autism Res.* Sep 2020;13(9):1430-1449. doi:10.1002/aur.2375
50. Fox K. Anatomical pathways and molecular mechanisms for plasticity in the barrel cortex. *Neuroscience.* 2002;111(4):799-814. doi:10.1016/s0306-4522(02)00027-1
51. Glazewski S, Bejar R, Mayford M, Fox K. The effect of autonomous alpha-CaMKII expression on sensory responses and experience-dependent plasticity in mouse barrel cortex. *Neuropharmacology.* Nov 2001;41(6):771-8. doi:10.1016/s0028-3908(01)00097-1
52. Glazewski S, Chen CM, Silva A, Fox K. Requirement for alpha-CaMKII in experience-dependent plasticity of the barrel cortex. *Science.* Apr 19 1996;272(5260):421-3. doi:10.1126/science.272.5260.421
53. Yu H, Pan B, Weyer A, et al. CaMKII Controls Whether Touch Is Painful. *J Neurosci.* Oct 21 2015;35(42):14086-102. doi:10.1523/JNEUROSCI.1969-15.2015
54. Zeitz KP, Giese KP, Silva AJ, Basbaum AI. The contribution of autophosphorylated alpha-calcium-calmodulin kinase II to injury-induced persistent pain. *Neuroscience.* 2004;128(4):889-98. doi:10.1016/j.neuroscience.2004.07.029
55. Zhu YB, Jia GL, Wang JW, et al. Activation of CaMKII and GluR1 by the PSD-95-GluN2B Coupling-Dependent Phosphorylation of GluN2B in the Spinal Cord in a Rat Model of Type-2 Diabetic Neuropathic Pain. *J Neuropathol Exp Neurol.* Jul 1 2020;79(7):800-808. doi:10.1093/jnen/nlaa035
56. Zhou YQ, Liu DQ, Chen SP, et al. Cellular and Molecular Mechanisms of Calcium/Calmodulin-Dependent Protein Kinase II in Chronic Pain. *J Pharmacol Exp Ther.* Nov 2017;363(2):176-183. doi:10.1124/jpet.117.243048

## Legend

### Figure 1. Stereotypic jumping during open-field testing of the three *Camk2a* mutant mouse lines.

**A-C:** Total jumps in 60 min (mean  $\pm$  SEM).

E183V-KI (**A**): Kruskal-Wallis,  $P=0.012$ ; Dunn's *post hoc* analysis.

Null (**B**): 1-way ANOVA,  $P<0.0001$ ; Bonferroni's *post hoc* analysis.

T286A-KI (**C**): 1-way ANOVA,  $P=0.0008$ ; Bonferroni's *post hoc* analysis.

Symbols for panels A-C indicate  $P \leq 0.05$  for \*,  $P \leq 0.01$  for \*\*, and  $P \leq 0.001$  for \*\*\*.

**D-F:** Number of jumps in 5 min time windows (mean  $\pm$  SEM) across the 60 min open-field test. All data analyzed with a 2-way repeated-measures ANOVA and Tukey's *post hoc* analysis

E183V-KI (**D**): interaction,  $F(22, 627) = 1.347$ ,  $P=0.1337$ ; genotype,  $F(2, 57) = 5.919$ ,  $P=0.0046$ ; time,  $F(11, 627) = 33.39$ ,  $P<0.0001$ .

Null (**E**): interaction,  $F(22, 616) = 1.962$ ,  $P=0.0056$ ; genotype,  $F(2, 56) = 18.15$ ,  $p<0.0001$ ; time,  $F(11, 616) = 7.966$ ,  $P<0.0001$ .

T286A-KI (**F**): interaction,  $F(22, 506) = 1.069$ ,  $P=0.3768$ ; genotype,  $F(2, 46) = 8.400$ ,  $P=0.0008$ ; time,  $F(11, 506) = 32.69$ ,  $P<0.0001$

Symbols for individual time points in panels D-F indicate  $P < 0.05$  for: †, WT vs HET; \*, WT vs HOM; ‡, HET vs HOM.

Numbers of WT, HET and HOM mice, respectively, were: E183V-KI: 20, 24, 16. Null: 18, 16, 25. T286A-KI: 16, 18, 15.

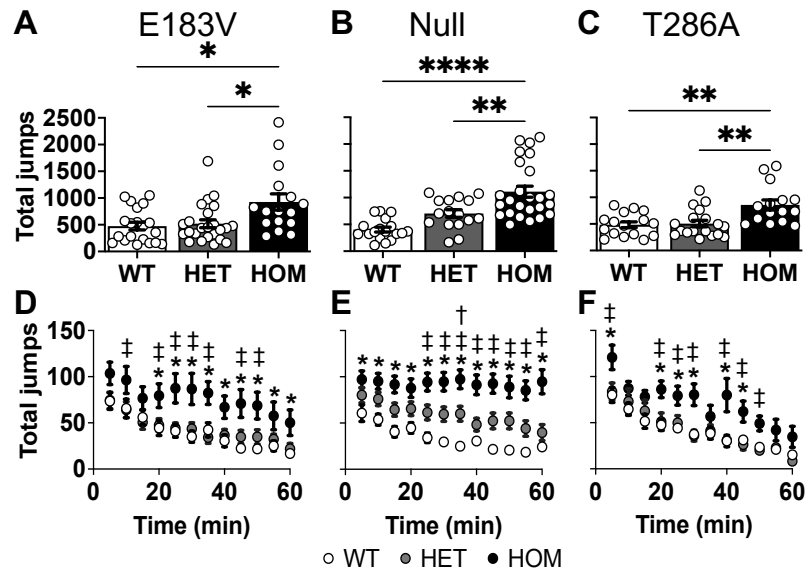



**Figure 2. Distances travelled during open-field testing of the three *Camk2a* mutant mouse lines.**

**A-C:** Total distance traveled in 60 min (mean  $\pm$  SEM).

E183V-KI (**A**): Kruskal-Wallis  $P=0.0074$ ; Dunn's *post hoc* analysis.

Null (**B**): 1-way ANOVA  $P<0.0001$ ; Bonferroni's *post hoc* analysis

T286A-KI (**C**): 1-way ANOVA  $P=0.0043$ ; Bonferroni's *post hoc* analysis.

Symbols panels A-C indicate  $P\leq 0.05$  for \*,  $P\leq 0.01$  for \*\*, and  $P\leq 0.0001$  for \*\*\*\*.

**D-F:** Distances traveled in 5 min time windows (mean  $\pm$  SEM). All data analyzed using a 2-way repeated-measures ANOVA with Tukey's *post hoc* analysis.

E183V-KI (**D**): interaction,  $F(22, 627) = 1.178$ ,  $P=0.2608$ ; genotype,  $F(2, 57) = 3.342$ ,  $P=0.0424$ ; time,  $F(11, 627) = 110.1$ ,  $P<0.0001$ .

Null (**E**): interaction,  $F(22, 616) = 1.867$ ,  $P=0.0097$ ; genotype,  $F(2, 56) = 29.87$ ,  $P<0.0001$ ; time,  $F(11, 616) = 77.11$ ,  $P<0.0001$ .

T286A-KI (**F**): interaction,  $F(22, 506) = 2.025$ ,  $P=0.0040$ ; genotype,  $F(2, 46) = 6.146$ ,  $P=0.0043$ ; time,  $F(11, 506) = 66.29$ ,  $P<0.0001$ .

Symbols for individual time points in panels D-F indicate  $P < 0.05$  for: †, WT vs HET; \*, WT vs HOM; ‡, HET vs HOM.

Numbers of WT, HET and HOM mice, respectively, were: E183V-KI: 20, 24, 16. Null: 18, 16, 25. T286A-KI: 16, 18, 15.

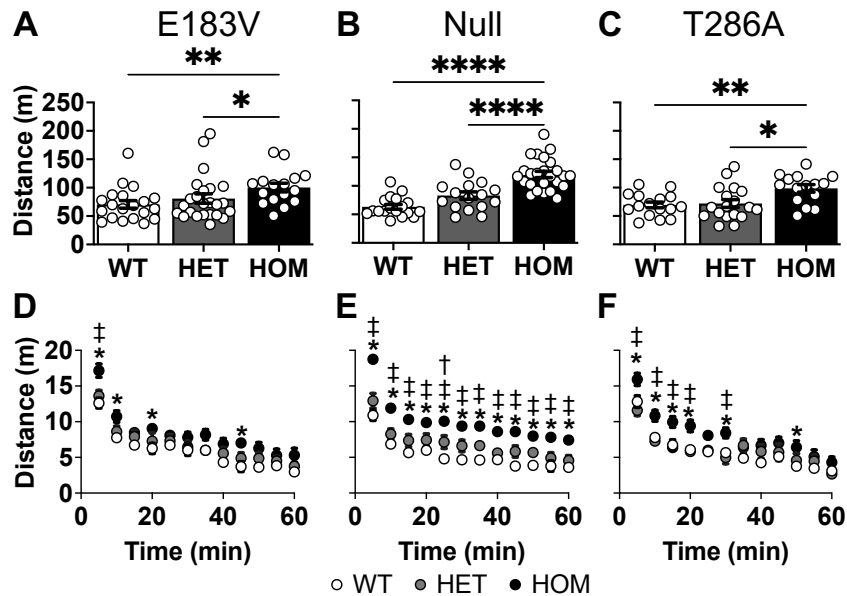

**Figure 3. Social exploration by the three *Camk2a* mutant mouse lines in the 3CST.**

**A-C.** Times (mean  $\pm$  SEM) spent exploring the left (L) versus the right(R) chamber for CaMKII $\alpha$  E183V-KI (**A**), Null (**B**), and T286A-KI (**C**) mice. Panels **A-F** analyzed using a 2-way repeated-measures ANOVA with Bonferroni's *post hoc* analysis.

E183V-KI (**A**): interaction,  $F(2, 49) = 0.2152, P=0.8072$ ; genotype,  $F(2, 49) = 7.258, P=0.0017$ ; chamber,  $F(1, 49) = 0.4556, P=0.5029$ .

Null (**B**): interaction,  $F(2, 32) = 1.093, P=0.3474$ ; genotype,  $F(2, 32) = 14.58, P<0.0001$ ; chamber,  $F(1, 32) = 2.379, P=0.1328$ .

T286A-KI (**C**): interaction,  $F(2, 32) = 1.437, P=0.2525$ ; genotype,  $F(2, 32) = 0.5982, P=0.5558$ ; chamber,  $F(1, 32) = 0.05761, P=0.8118$ .

**D-F.** Times (mean  $\pm$  SEM) spent closely interacting with an empty wire pencil cup (E) versus an identical cup sheltering a novel mouse (M) for CaMKII $\alpha$  E183V-KI (**D**), Null (**E**), and T286A-KI (**F**) mice.

E183V-KI (**D**): interaction,  $F(2, 49) = 4.220, P=0.0204$ ; genotype,  $F(2, 49) = 1.593, P=0.2136$ ; chamber,  $F(1, 49) = 65.58, P<0.0001$ .

Null (**E**): interaction,  $F(2, 32) = 3.744, P=0.0346$ ; genotype,  $F(2, 32) = 1.481, P=0.2427$ ; chamber,  $F(1, 32) = 41.89, P<0.0001$ .

T286A-KI (**F**): interaction,  $F(2, 32) = 0.5436, P=0.5859$ ; genotype,  $F(2, 32) = 1.151, P=0.3290$ ; chamber,  $F(1, 32) = 19.63, P=0.0001$ .

**G-I.** Distance traveled (mean  $\pm$  SEM) for CaMKII $\alpha$  E183V-KI (**G**), Null (**H**), and T286A-KI (**I**) mice.

E183V-KI (**A**): Kruskal-Wallis,  $P=0.0025$ ; Dunn's *post hoc* analysis.

Null (**B**): Kruskal-Wallis,  $P=0.0004$ ; Dunn's *post hoc* analysis.

T286A-KI (**C**): 1-way ANOVA,  $F(2, 32) = 11, P=0.0003$ ; Bonferroni's *post hoc* analysis

Symbols indicate  $P\leq 0.05$  for \*,  $P\leq 0.01$  for \*\*,  $P\leq 0.001$  for \*\*\* and  $P\leq 0.0001$  for \*\*\*\*.

Numbers of WT, HET and HOM mice, respectively, were: E183V-KI: 20, 9, 23. Null: 9, 8, 18. T286A-KI: 16, 8, 11.

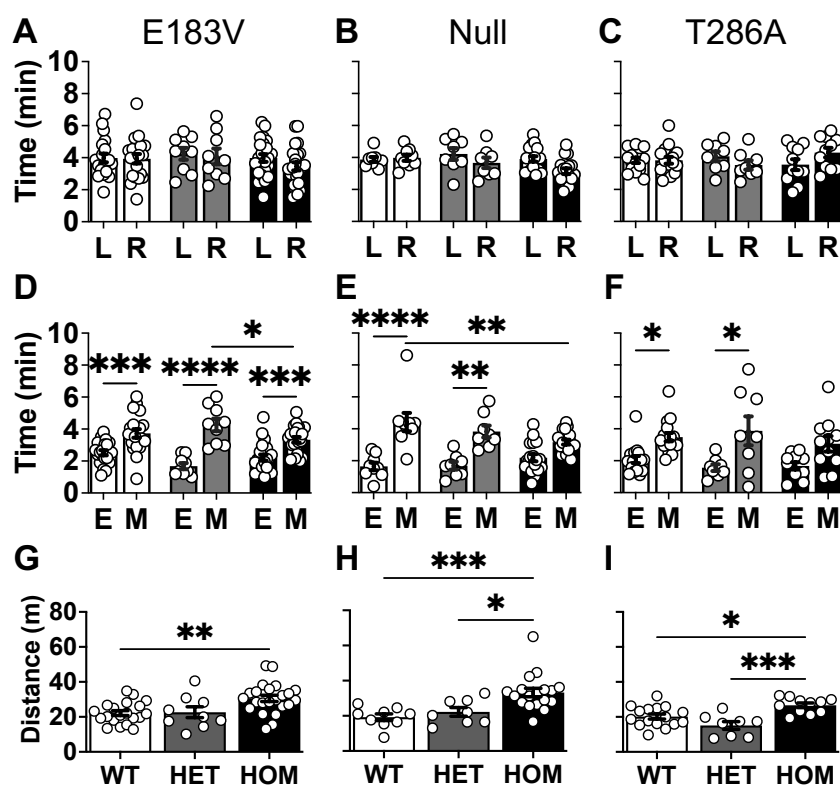

**Figure 4. Center time during open-field testing of the three *Camk2a* mutant mouse lines.**

**A-C:** Time in center during the first 10 mins (mean  $\pm$  SEM).

E183V-KI (**A**): 1-way ANOVA,  $P=0.0006$ ; Bonferroni's *post hoc* analysis.

Null (**B**): 1-way ANOVA,  $P<0.0001$ ; Bonferroni's *post hoc* analysis.

T286A-KI (**C**): 1-way ANOVA,  $P<0.0001$ ; Bonferroni's *post hoc* analysis.

**D-F:** Time in center during the last 10 mins (mean  $\pm$  SEM).

E183V-KI (**D**): 1-way ANOVA,  $P=0.0431$ ; Bonferroni's *post hoc* analysis.

Null (**E**): 1-way ANOVA,  $P=0.0074$ ; Bonferroni's *post hoc* analysis.

T286A-KI (**F**): 1-way ANOVA,  $P=0.0003$ ; Bonferroni's *post hoc* analysis.

Symbols indicate  $P\leq 0.05$  for \*,  $P\leq 0.01$  for \*\*,  $P\leq 0.001$  for \*\*\* and  $P\leq 0.0001$  for \*\*\*\*.

Numbers of WT, HET and HOM mice, respectively, were: E183V-KI: 20, 24, 16. Null: 18, 16, 25. T286A-KI: 16, 18, 15.

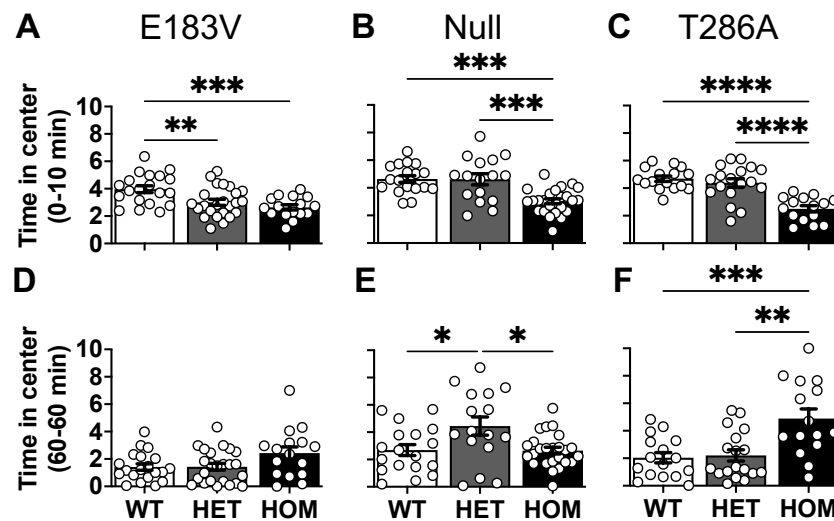

**Figure 5. Anxiety-related behaviors during EPM testing of the three *Camk2a* mutant mouse lines.**

**A-C:** Times spent (mean  $\pm$  SEM) on the open and closed arms (open and closed bars, respectively) of the EPM for CaMKII $\alpha$  E183V-KI (**A**), Null (**B**), and T286A-KI (**C**) mice. All data analyzed using a 2-way repeated-measures ANOVA with Tukey's *post hoc* analysis.

E183V-KI (**A**): interaction,  $F(2, 60) = 11.04, P < 0.0001$ ; genotype,  $F(2, 60) = 2.472, P = 0.0930$ ; arm,  $F(1, 60) = 331.5, P < 0.0001$ .

Null (**B**): interaction,  $F(2, 59) = 24.77, P < 0.0001$ ; genotype,  $F(2, 59) = 8.685, P = 0.0005$ ; arm,  $F(1, 59) = 71.87, P < 0.0001$ .

T286A-KI (**C**): interaction,  $F(2, 30) = 34.51, P < 0.0001$ ; genotype,  $F(2, 30) = 1.021, P = 0.3723$ ; arm,  $F(1, 30) = 77.38, P < 0.0001$ .

**D-F:** Numbers of entries (mean  $\pm$  SEM) onto the open and closed arms of the EPM for CaMKII $\alpha$  E183V-KI (**D**), Null (**E**), and T286A-KI (**F**) mice.

E183V-KI (**D**): interaction,  $F(2, 60) = 2.860, P = 0.0651$ ; genotype,  $F(2, 60) = 12.66, P < 0.0001$ ; arm,  $F(1, 60) = 72.28, P < 0.0001$ .

Null (**E**): interaction,  $F(2, 59) = 9.900, P = 0.0002$ ; genotype,  $F(2, 59) = 3.954, P = 0.0245$ ; arm,  $F(1, 59) = 26.77, P < 0.0001$ .

T286A-KI (**F**): interaction,  $F(2, 30) = 20.03, P < 0.0001$ ; genotype,  $F(2, 30) = 6.382, P = 0.0049$ ; arm,  $F(1, 30) = 24.82, P < 0.0001$ .

**G-I:** Distances traveled (mean  $\pm$  SEM) on the open and closed arms of the EPM for CaMKII $\alpha$  E183V-KI (**G**), Null (**H**), and T286A-KI (**I**) mice.

E183V-KI (**G**): interaction,  $F(2, 60) = 1.008, P = 0.3710$ ; genotype,  $F(2, 60) = 15.99, P < 0.0001$ ; arm,  $F(1, 60) = 299.4, P < 0.0001$ .

Null (**H**): interaction,  $F(2, 59) = 6.944, P = 0.0020$ ; genotype,  $F(2, 59) = 15.79, P < 0.0001$ ; arm,  $F(1, 59) = 150.6, P < 0.0001$ .

T286A-KI (**I**): interaction,  $F(2, 30) = 10.87, P = 0.0003$ ; genotype,  $F(2, 30) = 14.31, P < 0.0001$ ; arm,  $F(1, 30) = 75.54, P < 0.0001$ .

Numbers of WT, HET and HOM mice, respectively, were: E183V-KI: 20, 29, 15. Null: 16, 21, 25. T286A-KI: 9, 12, 12.

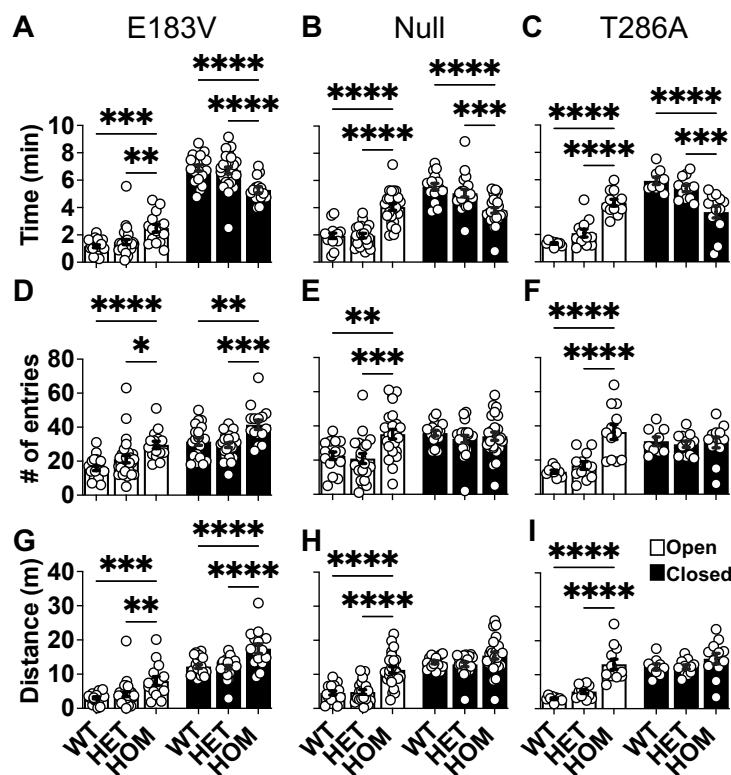

**Figure 6. Anxiety-related behaviors during light-dark (LD) testing of the three *Camk2a* mutant mouse lines.**

**A-C:** Times spent (mean  $\pm$  SEM) on the light or dark sides (open and filled bars, respectively) of the LD box for CaMKII $\alpha$  E183V-KI (**A**), Null (**B**), and T286A-KI (**C**) mice. Panels **A-C** and **G-I** analyzed using a 2-way repeated-measures ANOVA with Tukey's *post hoc analysis*

E183V-KI (**A**): interaction,  $F(2, 45) = 0.6832$ ,  $P = 0.5101$ ; genotype,  $F(2, 45) = 505.8$ ,  $P < 0.0001$ ; chamber,  $F(1, 45) = 94.79$ ,  $P < 0.0001$ .

Null (**B**): interaction,  $F(2, 26) = 14.66$ ,  $P < 0.0001$ ; genotype,  $F(2, 26) = 0.000$ ,  $P > 0.9999$ ; chamber,  $F(1, 26) = 349.8$ ,  $P < 0.0001$ .

T286A-KI (**C**): interaction,  $F(2, 22) = 2.833$ ,  $P = 0.0804$ ; genotype,  $F(2, 22) = 8.827$ ,  $P = 0.0015$ ; chamber,  $F(1, 22) = 18.66$ ,  $P = 0.0003$ .

**D-F:** The numbers of entries (mean  $\pm$  SEM) into the light or dark sides during the LD test for CaMKII $\alpha$  E183V-KI (**D**), Null (**E**), and T286A-KI (**F**) mice.

E183V-KI (**D**): Kruskal-Wallis,  $P = 0.1712$ .

Null (**E**): 1-way ANOVA,  $F(2, 26) = 1.2$ ,  $P = 0.3185$ .

T286A-KI (**F**): Kruskal-Wallis,  $P = 0.8710$ .

**G-I:** Distance traveled (mean  $\pm$  SEM) on the light or dark sides of the LD box for CaMKII $\alpha$  E183V-KI (**G**), Null (**H**), and T286A-KI (**I**) mice. All data analyzed using a 2-way repeated-measures ANOVA with Tukey's *post hoc analysis*.

E183V-KI (**G**): interaction,  $F(2, 45) = 1.341$ ,  $P = 0.2718$ ; genotype,  $F(2, 45) = 10.22$ ,  $P = 0.0002$ ; chamber,  $F(1, 45) = 115.3$ ,  $P < 0.0001$ .

Null (**H**): interaction,  $F(2, 26) = 0.1718$ ,  $P = 0.8431$ ; genotype,  $F(2, 26) = 4.540$ ,  $P = 0.0204$ ; chamber,  $F(1, 26) = 75.90$ ,  $P < 0.0001$ .

T286A-KI (**I**): interaction,  $F(2, 22) = 1.136$ ,  $P = 0.3393$ ; genotype,  $F(2, 22) = 1.813$ ,  $P = 0.1868$ ; chamber,  $F(1, 22) = 20.84$ ,  $P = 0.0002$ .

Numbers of WT, HET and HOM mice, respectively, were: E183V-KI: 20, 12, 16. Null: 8, 7, 14. T286A-KI: 7, 10, 8.

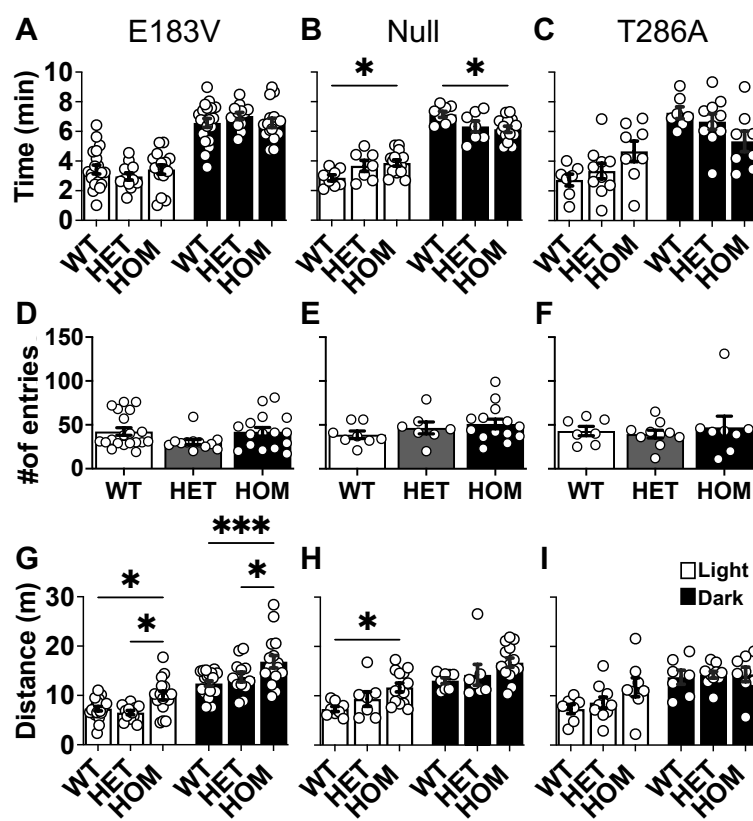

**Figure 7. Tactile sensitivity of the three *Camk2a* mutant mouse lines in the VFF test.**

**A-C:** Force required to evoke paw withdrawal (mean  $\pm$  SEM).

E183V-KI (**A**): Kruskal-Wallis,  $P=0.0010$  with Dunn's *post hoc* analysis

Null (**B**): Kruskal-Wallis,  $P=0.0021$  with Dunn's *post hoc* analysis

T286A-KI (**C**): 1-way ANOVA,  $P=0.0026$  with Bonferroni's *post hoc* analysis

Numbers of WT, HET and HOM mice, respectively, were: E183V-KI: 22, 38, 24. Null: 13, 6, 14. T286A-KI: 15, 12, 13.

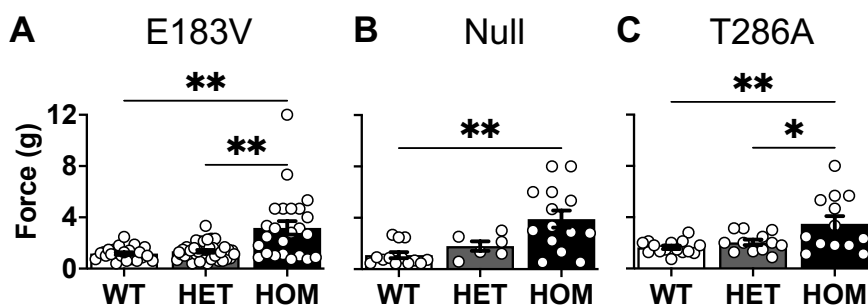

Source: https://www.biorxiv.org/content/10.1101/2022.10.28.514232v1.full.pdf
